1           **Causal association between serum bilirubin and ischemic stroke:**  
2                           **Multivariable Mendelian Randomization**

3  
4           Jong Won Shin<sup>1)\*</sup>, Keum Ji Jung<sup>1,2)\*</sup>, Heejin Kimm<sup>1,2)</sup>, Sun Ha Jee<sup>1,2)</sup>

5           1) Department of Epidemiology and Health Promotion, Graduate School of  
6           Public Health, Yonsei University, Seoul, Korea

7           2) Institute for Health Promotion, Department of Epidemiology and Health  
8           Promotion, Graduate School of Public Health, Yonsei University, Seoul, Korea

9  
10       \* Both authors contributed equally as first authors.

11  
12                           Running title: Serum bilirubin and ischemic stroke

13  
14       **Correspondence:**

15           Sun Ha Jee, PhD, MPH

16           Department of Epidemiology and Health Promotion, Graduate School of  
17           Public Health,

18           50-1 Yonsei-ro, Seodaemun-gu, Seoul 03772, Korea

19           Tel: 82-2-2228-1523, E-mail: [jsunha@yuhs.ac](mailto:jsunha@yuhs.ac)

25 **Abstract (230)**

26 **BACKGROUND:** Past studies have mainly focused on total bilirubin levels, and have  
27 not clearly distinguished between direct and indirect bilirubin, a subgroup of bilirubin.  
28 In this study, the differences between these subgroups were clearly examined, and  
29 the causal association with ischemic stroke was examined in more detail.

30 **METHODS:** Utilizing Two sample Multivariable Mendelian randomization (MVMR)  
31 analyses, summary data for bilirubin were extracted from the KCPS-II (Korean  
32 Cancer Prevention Study-II; n=159,844) and the KoGES (Korean Genome and  
33 Epidemiology Study; n=72,299), while ischemic stroke data were derived from the  
34 BBJ (Bio Bank Japan; n=201,800).

35 **RESULTS:** The crude two-sample MR analysis revealed a significant negative  
36 association between total bilirubin and ischemic stroke in KoGES data (odds ratio  
37 [OR], 0.86; 95% confidence interval [CI], 0.75-0.98). Subsequent bivariable MR  
38 analyses, controlling for lipid profile, also showed significant results. In KCPS-II data,  
39 direct bilirubin showed significance in both crude (0.65, 0.43-0.97) and bivariable  
40 analyses, while indirect bilirubin demonstrated significant associations in MVMR  
41 analyses (0.76, 0.59-0.98), emphasizing its role in mitigating the risk of ischemic  
42 stroke.

43 **CONCLUSIONS:** Our study establishes a causal association between genetically  
44 determined levels of serum bilirubin (total, direct, and indirect) and a reduced risk of  
45 ischemic stroke in an Asian population. Notably, the protective effect was  
46 predominantly associated with indirect bilirubin. The findings highlight the  
47 significance of considering bilirubin subgroup in understanding the mechanisms  
48 underlying endogenous antioxidants and its impact on ischemic stroke.

49 **Key Words:** bilirubin, ischemic stroke, multivariable mendelian randomization

## 50 INTRODUCTION

51

52 Stroke is a form of oxidative stress-related disease.<sup>1,2,3</sup> Serum bilirubin levels are  
53 widely reported to be inversely related to stroke risk in both Western populations<sup>4,5</sup>  
54 and Asian populations.<sup>6,7</sup> These studies have been based on serum total bilirubin  
55 levels. In other words, it is a result that does not take into account the specific levels  
56 of direct bilirubin (conjugated bilirubin) and indirect bilirubin (unconjugated bilirubin)  
57 that make up the total bilirubin. In fact, indirect bilirubin levels account for a large  
58 proportion of the subgroups of total bilirubin (reference values - total bilirubin: 0.3-1.0  
59 mg/dl, direct bilirubin: 0-0.3 mg/dl, indirect bilirubin: 0.2-0.8 mg/dl). Aged red blood  
60 cells are broken down into heme and globin, and then heme is broken down into iron  
61 (Fe<sup>2+</sup>) and biliverdin. In the process of oxidation to biliverdin (Figure 1), the level of  
62 indirect bilirubin acts as a powerful endogenous antioxidant.<sup>8,9</sup>

63 The First study on total bilirubin and stroke occurrence using genetic information was  
64 a case-cohort design of 806 stroke patients that occurred in a subcohort of 4,793  
65 subjects in the KCPS-II (Korean Cancer Prevention Study-II). This study, a one-  
66 sample mendelian randomization (MR) analysis, showed a negative association  
67 between total bilirubin and total stroke (HR=0.63, 95% CI 0.30–1.36), but did not  
68 show statistically significant results (p=0.240).<sup>10</sup> The second study performed a two-  
69 sample MR analysis of total bilirubin based on KoGES (Korean Genome and  
70 Epidemiology Study; n=25,406) and KCPS-II (n=14,541) biobank data.<sup>10</sup> The results  
71 provided evidence for a significant causal association between total bilirubin levels  
72 and reduced risk of stroke in the Korean population. In particular, the association  
73 was greater for ischemic stroke (OR=0.302) than for total stroke (OR=0.481).<sup>11</sup>

74 However, considering only serum total bilirubin, there was insufficient specific  
75 evidence to suggest a reduction in stroke risk through bilirubin's role as an  
76 endogenous antioxidant.

## 77 **OBJECTIVES**

- 78 1. We divided bilirubin into subgroups to determine whether each subgroup  
79 plays a role as an endogenous antioxidant.
- 80 2. We also investigated whether it was possible to suggest the significance of  
81 causal associations when adjusting for several genetic variables, which was  
82 not possible in existing MR studies.

83

## 84 **METHODS**

85 We analyzed total, direct, and indirect bilirubin data from KoGES (n=72,299)<sup>12</sup> and  
86 KCPS-II (n=159,844) biobanks<sup>13</sup> and ischemic stroke from BBJ (BioBank Japn;  
87 n=201,800).<sup>14</sup> data was used to perform Two Sample Multivariable MR (MVMR). In  
88 other words, MVMR was performed to control blood pressure, fasting blood sugar,  
89 and serum lipid levels related to stroke.

90

### 91 ***Genetic instruments for serum bilirubin (G-X)***

92 A genetic instrumental variable for serum bilirubin was identified using two Korean  
93 biobanks (KCPS-II and KoGES).<sup>12,13</sup> The selection of instrumental variables for MR  
94 analysis was based on the following criteria: First, cases with a *p-value* smaller than  
95 the genome-wide significance level identified in the study (*p-value* <5x10<sup>-8</sup>). The  
96 second, minor allele frequency (MAF) is greater than 0.01. The third, single  
97 nucleotide polymorphism (SNP)s with linkage disequilibrium (LD) relationship were

98 excluded (clumping criteria:  $r^2$  0.001 standard). Finally, palindromic (SNP) was  
99 excluded from the analysis (MAF > 0.42).

100

101

## 102 ***Genetic associations of SNPs with ischemic stroke (G-Y)***

103 Summary data used for ischemic stroke were obtained from BBJ.<sup>14</sup> BBJ is a biobank  
104 composed of 201,800 patient data centered on 66 hospitals nationwide between  
105 2003 and 2008.

106

## 107 ***Mendelian randomization***

108 In this study, G-X data on exposure as two-sample MR came from KCPS-II and  
109 KoGES. And G-Y data for outcome came from BBJ. The coefficient was estimated  
110 using the inverse variance weighted (IVW) method under the assumption that all  
111 selected SNPs were valid. At this study, coefficient was calculated by calculating the  
112 coefficient of each SNP according to the wald ratio method and combining it using  
113 the IVW method.

114 Multivariable MR (MVMR) analysis was performed controlling for genetic variables of  
115 triglyceride (TG), cholesterol (LDL; low density lipoprotein, HDL; high density  
116 lipoprotein), systolic blood pressure (SBP), and fasting blood sugar (FBS), which are  
117 noted as major causes of stroke. To ensure the validity of instrumental variables, the  
118 F-value of each variable was presented in each model.

119

120 Analyses were conducted using the Two Sample MR package in R, version 3.6.0 (R  
121 Project for Statistical Computing).

122

## 123 **RESULTS**

124

125 This study divided bilirubin into total, direct, and indirect bilirubin and analyzed  
126 Mendelian randomization for each of them for their association with the risk of  
127 ischemic stroke. In this study, summary data for bilirubin was extracted from KoGES  
128 and KCPS-II, respectively, and summary data for ischemic stroke was used from  
129 BBJ data.

130 Table 1 shows crude two-sample MR and MVMR results on the effect of total  
131 bilirubin on ischemic stroke. It showed a significant negative association that crude  
132 two sample MR analysis between total bilirubin and ischemic stroke in KoGES data  
133 (OR, 0.86, 95%CI, 0.75-0.98). In addition, MVMR, controlling for LDL, HDL, and TG,  
134 respectively, showed significant results. Additionally, there are borderline significant  
135 results in the crude two-sample MR results and in the model controlling LDL from  
136 KCPS-II. However, MVMR, controlling for HDL and TG, showed significant results. In  
137 the remaining models, a negative association between total bilirubin and ischemic  
138 stroke was observed, but it was not significant (Figure 1-A). The F-statistic of total  
139 bilirubin and other variables used in the model in Table 1 were all above 10 except  
140 for systolic blood pressure (SBP), and the assumption as an instrumental variable  
141 was satisfied (Supplementary Table 1).

142 Table 2 shows the crude two sample MR and MVMR results on the effect of direct  
143 bilirubin on ischemic stroke. KoGES data analysis showed a significant negative  
144 association only in crude two-sample MR ( $p=0.0493$ ). However, KCPS-II data  
145 analysis showed significant results in crude two sample MR, and also showed

146 significant results in MVMR with LDL, HDL, and TG controlled respectively. The  
147 remaining model showed a negative relationship, but it was not significant (Figure 1-  
148 B). The F values of direct bilirubin and control variables used in the model in Table 2  
149 were all above 10 except for SBP, and the assumption as an instrumental variable  
150 was satisfied (Supplementary Table 2).

151 Table 3 showed the crude two sample MR and MVMR results on the effect of indirect  
152 bilirubin on ischemic stroke. KoGES results showed a significant negative correlation  
153 only in crude two sample MR ( $P=0.0253$ ). However, in the KCPS-II data analysis, the  
154 crude two sample MR showed a borderline significant result, but the MVMR analysis  
155 controlling the remaining LDL, HDL, and TG showed a significant result. In addition,  
156 MVMR, which simultaneously controlled LDL, HDL, and TG, showed significant  
157 results ( $P=0.0355$ ). This model showed significant results for indirect bilirubin even  
158 when SBP or FSG was additionally controlled (right side of Figure 1-C). The F values  
159 of indirect bilirubin and control variables used in the model in Table 3 were all above  
160 10 except for SBP, and the assumption as an instrumental variable was satisfied  
161 (Supplementary Table 3).

162 In the models presented in Tables 1, 2, and 3, the common feature of the other  
163 control factors except bilirubin was that only SBP consistently showed a significant  
164 causal relationship to the risk of ischemic stroke. However, LDL, TG, and FBS were  
165 not significant.

166

## 167 **DISCUSSION**

168

169 In this study, we showed that genetically determined levels of each bilirubin (total,



170 direct, and indirect bilirubin) in serum were causally associated with reduced risk of  
171 ischemic stroke in an Asian population. In particular, it was demonstrated that only  
172 indirect bilirubin had a strong protective effect in MVMR, which controlled for genetic  
173 factors related to ischemic stroke.

174 This study performed two sample MR to investigate the causal relationship between  
175 genetically determined levels of circulating serum bilirubin (total, direct, and indirect  
176 bilirubin) and the risk of ischemic stroke. In addition, the causal relationship was  
177 shown while controlling for genetic variables of TG, cholesterol (HDL, LDL), SBP,  
178 and FBS.

179 Interestingly, while controlling for genetic variables such as TG, cholesterol (HDL,  
180 LDL), SBP, and FBS, indirect bilirubin levels reduced the risk of ischemic stroke. On  
181 the other hand, for direct bilirubin, a somewhat weaker association was found. These  
182 research results are expected to contribute to understanding the mechanisms  
183 caused by oxidative stress in the future.

184 In the metabolic process of bilirubin, heme is broken down by heme oxygenase to  
185 produce carbon monoxide (CO), iron (Fe), and biliverdin.<sup>15,16</sup> In normal, healthy liver  
186 cells, biliverdin is converted to bilirubin via biliverdin reductase A (BVRA). Biliverdin  
187 reductase exists as two type of isoenzymes. BVRA and biliverdin reductase B  
188 (BLVRB) produce bilirubin IX $\alpha$  and bilirubin IX $\beta$ , respectively.<sup>15</sup> BVRA is critical for  
189 adult bilirubin production forming bilirubin IX $\alpha$ , whereas bilirubin IX $\beta$  is mostly  
190 present during fetal development. Bilirubin IX $\alpha$  is insoluble and binds to albumin in  
191 the blood (indirect bilirubin, unconjugated bilirubin), where it is transported to the liver  
192 and conjugated.<sup>15</sup>

193 Afterwards, bilirubin is conjugated in hepatocytes by the UGT1A1 UDP-

194 glucuronosyltransferase enzyme (direct bilirubin, conjugated bilirubin) and is  
195 eventually excreted in bile and reaches the intestines.<sup>16,17</sup>

196 Conjugated bilirubin is isolated by intestinal bacteria and reduced to urobilinoid. In  
197 this way, the enzymes and activity sites involved in each bilirubin during the  
198 metabolic process are different. Since the manifestation of the disease according to  
199 the increase or decrease in each of these levels appears completely different, it is  
200 believed that the classification of total bilirubin subgroups will have a significant  
201 impact on the results and direction of the research.

202 In two Sample MR, exposure variables and outcome data are each extracted from  
203 two independent biobanks. This is advantageous when exposure and outcome data  
204 are not available from the same biobank. This study used serum bilirubin data from  
205 KoGES and KCPS-II. For ischemic stroke data, MR analysis could be performed  
206 using the same Asian data from BBJ.

207 Additionally, utilizing multiple samples improves the overall sample size and  
208 subsequent precision of causal effect estimates. As a result, we not only re-proved  
209 the causal relationship between bilirubin levels and stroke risk reduction in Korean  
210 cases in the previous study,<sup>10,11</sup> but also confirmed the causal relationship between  
211 ischemic stroke risk reduction in Japanese as an Asian population.

212 Evidence from numerous observational studies in humans indicates a strong  
213 negative association between serum bilirubin levels and cardiovascular disease. For  
214 example, bilirubin has antioxidant properties, including scavenging reactive oxygen  
215 species (ROS) and inhibiting nicotinamide adenine dinucleotide phosphate (NADPH)  
216 oxidase activity, thereby oxidative stress, which is critically involved in the  
217 pathogenesis and development of atherosclerosis.<sup>18,19</sup>

218 Additionally, serum total bilirubin concentration was negatively associated with  
219 arteriosclerosis in Chinese men,<sup>20</sup> and in a German population, serum bilirubin levels  
220 were observed to be inversely associated with coronary artery calcification and  
221 cardiovascular disease.<sup>21</sup>In the Chinese population, serum total bilirubin levels were  
222 negatively associated with subclinical cerebral infarction, which increased the risk of  
223 transient ischemic attack, symptomatic stroke, and cardiovascular disease.<sup>22</sup>  
224 Regarding stroke risk, a cross-sectional study of Americans conducted from 1999 to  
225 2004, the National Health and Nutrition Examination Survey, reported that serum  
226 total bilirubin levels were inversely associated with stroke outcomes.<sup>23</sup> Especially in  
227 the Korean population, serum bilirubin concentration was estimated to be negatively  
228 correlated with ischemic stroke in men.<sup>6</sup>  
229 Additionally, several experimental studies support the results of this study. When  
230 bilirubin acts as a ROS scavenger, indirect bilirubin (albumin-bound unconjugated  
231 bilirubin) is oxidized to its non-toxic metabolic precursor biliverdin, which is then  
232 recycled back to bilirubin by biliverdin reductase.<sup>19,24,25</sup> In vitro studies have shown  
233 that indirect bilirubin (unconjugated bilirubin bound to albumin) is oxidized by  $O_2^-$ ,  
234  $OH$  and  $HO_2$  and that unconjugated bilirubin protects albumin from oxidation by  $O_2^-$ ,  
235  $OH$ ,  $HO_2$  and  $ONOO^-$ . Indirect bilirubin can act as an antioxidant by directly  
236 scavenging ROS.<sup>19,25,26</sup> In addition, indirect bilirubin has been shown to inhibit the  
237 activity of NADPH oxidase, a major source of ROS in the vascular system, in vitro  
238 and in vivo, suggesting that the production of ROS is reduced by indirect  
239 bilirubin.<sup>18,27</sup> Moreover, bilirubin has been shown to interact with other antioxidants to  
240 synergistically inhibit lipid peroxidation.<sup>28,29</sup> Taken together, these experimental  
241 findings indicate that indirect bilirubin can function as an antioxidant by interacting

242 synergistically with other antioxidants to scavenge ROS, inhibit NADPH oxidase  
243 activity, and inhibit lipid oxidation.

244 Bilirubin is a key indicator that continues to be studied today as studies have linked it  
245 to the risk of oxidative stress-related diseases in humans, such as cardiovascular  
246 disease, including stroke, diabetes, metabolic syndrome, certain cancers, and  
247 autoimmune diseases.<sup>29</sup> The above research results suggest that specific studies of  
248 other oxidative stress-related diseases can be conducted based on the detailed  
249 bilirubin index and each bilirubin level presented by controlling various genetic  
250 variables.

251 The strengths and limitations of this study are as follows. The strength is that  
252 bilirubin data was obtained from KCPS-II and KoGES data as a Korean biobank for  
253 two-sample MR analysis, and stroke data is large-scale data using the Japanese  
254 biobank BBJ. Additionally, unlike previous studies, this is the first study to look at the  
255 effects of direct and indirect bilirubin in addition to total bilirubin. A limitation is that  
256 only ischemic stroke was included in the study, and total stroke and hemorrhagic  
257 stroke were not included. However, in previous studies examining bilirubin and  
258 stroke, only ischemic stroke showed a significant association.

259

## 260 **CONCLUSIONS**

261 This study causally proved that indirect bilirubin is a very significant causal protective  
262 factor in the risk of ischemic stroke. However, when comparing systolic blood  
263 pressure and indirect bilirubin, which are shown to be the same causal factor  
264 although the direction is different, indirect bilirubin has a very wide confidence  
265 interval. This implies that the reliability and statistical significance of the estimation

266 results remain low. In the future, it is believed that research should continue to gain a  
267 deeper understanding of the protective effect of indirect bilirubin on ischemic stroke.

268 **Acknowledgements** We would like to thank the staff at Korea Medical Institute for  
269 their assistance in data collection. We would also like to thank the staff at the other  
270 11 general health examination centers who participated in this study for their  
271 assistance in data collection.

272 **Source of Funding** This research was supported by a grant of the Korea Health  
273 Technology R&D Project through the Korea Health Industry Development Institute  
274 (KHIDI), funded by the Ministry of Health & Welfare, Republic of Korea (HI20C0517).

#### 275 **Disclosures**

276 None.

277 **Contributors** SHJ, KJJ and HK had full access to all of the data in the study and  
278 takes responsibility for the integrity of the data and the accuracy of the data analysis.

279 Study concept and design: SHJ, KJJ and HK. Diagnostic testing and statistical  
280 analysis: SHJ and KJJ.

281 Drafting of the manuscript: JWS and KJJ.

282 Critical revision of the manuscript for important intellectual content: SHJ and HK.

283 Study supervision and organization of the project: SHJ and HK.

284 **Ethical approval** This study protocol was approved by the Institutional Review  
285 Board of the Severance Hospital (approval number: 4-2011-0277).

286

#### 287 **ORCID iDs**

288 Jong Won Shin [http:// orcid. org/ 0009-0003-8587-1445](http://orcid.org/0009-0003-8587-1445)

289 Keum Ji Jung [http:// orcid. org/ 0000-0003-4993-0666](http://orcid.org/0000-0003-4993-0666)

290 Heejin Kimm [http:// orcid. org/ 0000 0003 4526 0570](http://orcid.org/0000-0003-4526-0570)

291 Sun Ha Jee [http:// orcid. org/ 0000-0001-9519-3068](http://orcid.org/0000-0001-9519-3068)

292

293 **Figure legend**

294 Figure 1. Causal association between total, direct, and indirect bilirubin and ischemic  
295 stroke using MVMR

296 **References**

297

298 1. Sierra C, Coca A, Schiffrin EL. Vascular mechanisms in the pathogenesis of stroke.

299 *Curr Hypertens Rep.* 2011;13:200–207. doi: 10.1007/s11906-011-0195-x

300

301 2. Allen CL, Bayraktutan U. Oxidative stress and its role in the pathogenesis of

302 ischaemic stroke. *Int J Stroke.* 2009;4:461–470. doi: 10.1111/j.1747-

303 4949.2009.00387.x

304

305 3. Khoshnam SE, Winlow W, Farzaneh M, Farbood Y, Moghaddam HF. Pathogenic

306 mechanisms following ischemic stroke. *Neurol Sci.* 2017;38:1167– 1186. doi:

307 10.1007/s10072-017-2938-1

308

309 4. Kunutsor SK, Bakker SJ, Gansevoort RT, Chowdhury R, Dullaart RP. Circulating

310 total bilirubin and risk of incident cardiovascular disease in the general population.

311 *Arterioscler Thromb Vasc Biol.* 2015;35:716–724. doi:

312 10.1161/ATVBAHA.114.304929

313

314 5. Perlstein TS, Pande RL, Creager MA, Weuve J, Beckman JA. Serum total bilirubin

315 level, prevalent stroke, and stroke outcomes: nhanes 1999-2004. *Am J Med.*

316 2008;121:781–788 e781. doi: 10.1016/j.amjmed.2008.03.045

317

318 6. Kimm H, Yun JE, Jo J, Jee SH. Low serum bilirubin level as an independent

319 predictor of stroke incidence: a prospective study in Korean men and women. *Stroke.*

320 2009;40:3422–3427. doi: 10.1161/STROKEAHA.109.560649



321

322 7. Oda E, Kawai R. A possible cross-sectional association of serum total bilirubin  
323 with coronary heart disease and stroke in a Japanese health screening population.  
324 Heart Vessels. 2012;27:29–36. doi: 10.1007/s00380-011-0123-7

325

326 8. Sedlak TW, Snyder SH. Bilirubin benefits: cellular protection by a biliverdin  
327 reductase antioxidant cycle. Pediatrics. 2004;113:1776–1782. doi:  
328 10.1542/peds.113.6.1776

329

330 9. Gazzin S, Vitek L, Watchko J, Shapiro SM, Tiribelli C. A novel perspective on the  
331 biology of bilirubin in health and disease. Trends Mol Med. 2016;22:758–768. doi:  
332 10.1016/j.molmed.2016.07.004

333

334 10. Lee SJ, Jee YH, Jung KJ, Hong S, Shin ES, Jee SH. Bilirubin and Stroke Risk  
335 Using a Mendelian Randomization Design. Stroke. 2017 May;48(5):1154-1160. doi:  
336 10.1161/STROKEAHA.116.015083.

337

338 11. Choi Y, Lee SJ, Spiller W, Jung KJ, Lee JY, Kimm H, Back JH, Lee S, Jee SH.  
339 Causal Associations Between Serum Bilirubin Levels and Decreased Stroke Risk: A  
340 Two-Sample Mendelian Randomization Study. Arterioscler Thromb Vasc Biol. 2020  
341 Feb;40(2):437-445. doi: 10.1161/ATVBAHA.119.313055.

342

343 12. Kim Y, Han B-G, KoGES group. Cohort Profile: The Korean Genome and  
344 Epidemiology Study (KoGES) Consortium. Int J Epidemiol. 2017 Apr 1;46(2):e20. doi:  
345 10.1093/ije/dyv316.

- 346 13. Jee YH, Emberson J, Jung KJ, Lee SJ, Lee S, Back JH, Hong S, Kimm H,  
347 Sherliker P, Jee SH, Lewington S. Cohort Profile: The Korean Cancer Prevention  
348 Study-II (KCPS-II) Biobank. *Int J Epidemiol.* 2018 Apr 1;47(2):385-386f. doi:  
349 10.1093/ije/dyx226.
- 350 14. Nagai A, Hirata M, Kamatani Y, Muto K, Matsuda K, Kiyohara Y, Ninomiya T,  
351 Tamakoshi A, Yamagata Z, Mushiroda T, et al. BioBank Japan Cooperative Hospital  
352 Group; Kubo M. Overview of the BioBank Japan Project: Study design and profile.  
353 *J Epidemiol.* 2017; 27(3S):S2-S8. doi: 10.1016/j.je.2016.12.005. Epub 2017 Feb 8.  
354
- 355 15. O'Brien L, et al. Biliverdin reductase isozymes in metabolism. *Trends Endocrinol*  
356 *Metab.* 2015;26(4):212–20. [[PMC free article](#)] [[PubMed](#)] [[Google Scholar](#)]  
357
- 358 16. Tomaro ML, Batlle AM. Bilirubin: its role in cytoprotection against oxidative  
359 stress. *Int J Biochem Cell Biol.* 2002;34(3):216–20. [[PubMed](#)] [[Google Scholar](#)]  
360
- 361 17. Sundararaghavan VL, Sindhvani P, Hinds TD., Jr Glucuronidation and UGT  
362 isozymes in bladder: new targets for the treatment of uroepithelial  
363 carcinomas? *Oncotarget.* 2016 [[PMC free article](#)] [[PubMed](#)] [[Google Scholar](#)]  
364
- 365 18. Kwak JY, Takeshige K, Cheung BS, Minakami S: Bilirubin inhibits the activation  
366 of superoxide-producing NADPH oxidase in a neutrophil cell-free system. *Biochimica*  
367 *et biophysica acta*, 1991; 1076: 369-373 [[PubMed](#)] [[Google Scholar](#)]  
368
- 369 19. Stocker R, Yamamoto Y, McDonagh AF, Glazer AN, Ames BN: Bilirubin is an  
370 antioxidant of possible physiological importance. *Science*, 1987; 235; 1043-1046

371 [\[PubMed\]](#) [\[Google Scholar\]](#)

372 20. Li Y, Meng SY, Meng CC, Yu WG, Wang RT. Decreased serum bilirubin is  
373 associated with arterial stiffness in men. *Nutr Metab Cardiovasc Dis.* 2013;23:375–  
374 381. doi: 10.1016/j.numecd.2011.09.004

375

376 21. Mahabadi AA, Lehmann N, Möhlenkamp S, Kälsch H, Bauer M, Schulz R,  
377 Moebus S, Jöckel KH, Erbel R, Heusch G. Association of bilirubin with coronary  
378 artery calcification and cardiovascular events in the general population without  
379 known liver disease: the Heinz Nixdorf Recall study. *Clin Res Cardiol.*  
380 2014;103:647–653. doi: 10.1007/s00392-014-0697-z

381

382 22. Li RY, Cao ZG, Zhang JR, Li Y, Wang RT. Decreased serum bilirubin is  
383 associated with silent cerebral infarction. *Arterioscler Thromb Vasc Biol.*  
384 2014;34:946–951. doi: 10.1161/ATVBAHA.113.3030038

385 23. Perlstein TS, Pande RL, Creager MA, Weuve J, Beckman JA. Serum total  
386 bilirubin level, prevalent stroke, and stroke outcomes: nhanes 1999-2004. *Am J Med.*  
387 2008;121:781–788 e781. doi: 10.1016/j.amjmed.2008.03.045

388

389 24. Baranano DE, Rao M, Ferris CD, Snyder SH: Biliverdin reductase: a major  
390 physiologic cytoprotectant. *Proceedings of the National Academy of Sciences of the*  
391 *United States of America*, 2002; 99: 16093-16098 [\[PMC free](#)

392 [article\]](#) [\[PubMed\]](#) [\[Google Scholar\]](#)

393

394 25. Neuzil J, Stocker R: Bilirubin attenuates radical-mediated damage to serum  
395 albumin. *FEBS letters*, 1993; 331: 281-284 [\[PubMed\]](#) [\[Google Scholar\]](#)

396

397 26. Minetti M, Mallozzi C, Di Stasi AM, Pietraforte D: Bilirubin is an effective

398 antioxidant of peroxynitrite-mediated protein oxidation in human blood

399 plasma. *Archives of biochemistry and biophysics*, 1998; 352: 165-174

400 [\[PubMed\]](#) [\[Google Scholar\]](#)

401

402 27. Lanone S, Bloc S, Foresti R, Almolki A, Taille C, Callebert J, Conti M, Goven D,

403 Aubier M, Dureuil B, El-Benna J, Motterlini R, Boczkowski J: Bilirubin decreases

404 nos2 expression via inhibition of NAD(P)H oxidase: implications for protection

405 against endotoxic shock in rats. *FASEB journal: official publication of the Federation*

406 *of American Societies for Experimental Biology*, 2005; 19: 1890-1892

407 [\[PubMed\]](#) [\[Google Scholar\]](#)

408

409 28. Stocker R, Peterhans E: Synergistic interaction between vitamin E and the bile

410 pigments bilirubin and biliverdin. *Biochimica et biophysica acta*, 1989; 1002: 238-244

411 [\[PubMed\]](#) [\[Google Scholar\]](#)

412

413 29. Neuzil J, Stocker R: Free and albumin-bound bilirubin are efficient co-

414 antioxidants for alpha-tocopherol, inhibiting plasma and low density lipoprotein lipid

415 peroxidation. *The Journal of biological chemistry*, 1994; 269: 16712-16719

416 [\[PubMed\]](#) [\[Google Scholar\]](#)

417

418

419 Table 1. Causal effect of total bilirubin on ischemic stroke

|                                   | KoGES (total bilirubin), BBJ (ischemic stroke) |        | KCPS-II (total bilirubin), BBJ (ischemic stroke) |        |
|-----------------------------------|------------------------------------------------|--------|--------------------------------------------------|--------|
|                                   | IVW method, OR (95% CI)                        | P      | IVW method, OR (95% CI)                          | P      |
| Crude two sample MR               | 0.86 (0.75-0.98)                               | 0.0294 | 0.87 (0.77-0.99)                                 | 0.0652 |
| MVMR                              |                                                |        |                                                  |        |
| Adjusted for LDL                  | 0.86 (0.76-0.96)                               | 0.0097 | 0.89 (0.79-1.01)                                 | 0.0669 |
| Adjusted for HDL                  | 0.82 (0.73-0.93)                               | 0.0020 | 0.88 (0.79-0.99)                                 | 0.0326 |
| Adjusted for TG*                  | 0.99 (0.99-1.00)                               | 0.0545 | 0.87 (0.78-0.98)                                 | 0.0174 |
| Adjusted for LDL and HDL          | 0.96 (0.75-1.23)                               | 0.7520 | 0.95 (0.81-1.12)                                 | 0.5259 |
| Adjusted for LDL and TG           | 0.97 (0.76-1.23)                               | 0.7910 | 0.91 (0.79-1.05)                                 | 0.2009 |
| Adjusted for HDL and TG           | 0.84 (0.65-1.08)                               | 0.1751 | 0.94 (0.82-1.09)                                 | 0.4217 |
| Adjusted for LDL, HDL and TG      | 0.99 (0.78-1.25)                               | 0.9070 | 0.94 (0.82-1.08)                                 | 0.3682 |
| Adjusted for LDL, HDL, TG and SBP | 0.93 (0.76-1.15)                               | 0.5138 | 0.95 (0.84-1.08)                                 | 0.4658 |
| Adjusted for LDL, TG and SBP      | 0.87 (0.64-1.19)                               | 0.3891 | 0.92 (0.81-1.05)                                 | 0.2435 |
| Adjusted for LDL, TG, SBP and FSG | 0.90 (0.68-1.20)                               | 0.4877 | 0.92 (0.81-1.05)                                 | 0.2136 |
| Adjusted for LDL, TG, and FSG     | 0.83 (0.65-1.05)                               | 0.1249 | 0.91 (0.79-1.04)                                 | 0.1720 |

420 KoGES, Korean Genome Epidemiologic Study; KCPS-II, Korean Cancer Prevention Study-II; BBJ, Biobank of Japan; IVW, inverse variance weighted  
421 method; OR, odds ratio; CI, confidence interval; MVMR, multivariable mendelian randomization; LDL, low density lipoprotein; HDL, high density lipoprotein;  
422 TG, triglyceride; SBP, systolic blood pressure; FBS, fasting serum glucose

423 Table 2. Causal effect of direct bilirubin on ischemic stroke

|                                   | KoGES (direct bilirubin), BBJ (ischemic stroke) |        | KCPS-II (direct bilirubin), BBJ (ischemic stroke) |        |
|-----------------------------------|-------------------------------------------------|--------|---------------------------------------------------|--------|
|                                   | IVW method, OR (95% CI)                         | P      | IVW method, OR (95% CI)                           | P      |
| Crude two sample MR               | 0.67 (0.45-1.00)                                | 0.0493 | 0.65 (0.43-0.97)                                  | 0.0335 |
| MVMR                              |                                                 |        |                                                   |        |
| Adjusted for LDL                  | 0.94 (0.55-1.60)                                | 0.8173 | 0.64 (0.46-0.89)                                  | 0.0093 |
| Adjusted for HDL                  | 0.90 (0.52-1.56)                                | 0.7202 | 0.65 (0.47-0.91)                                  | 0.0125 |
| Adjusted for TG*                  | 0.80 (0.47-1.36)                                | 0.4136 | 0.64 (0.46-0.88)                                  | 0.0064 |
| Adjusted for LDL and HDL          | 0.81 (0.37-1.77)                                | 0.5987 | 0.72 (0.43-1.19)                                  | 0.2034 |
| Adjusted for LDL and TG           | 1.02 (0.46-2.25)                                | 0.9557 | 0.91 (0.56-1.46)                                  | 0.6940 |
| Adjusted for HDL and TG           | 1.34 (0.73-2.46)                                | 0.3469 | 0.84 (0.47-1.52)                                  | 0.5728 |
| Adjusted for LDL, HDL and TG      | 0.72 (0.41-1.27)                                | 0.2619 | 0.92 (0.59-1.45)                                  | 0.7304 |
| Adjusted for LDL, HDL, TG and SBP | 0.88 (0.49-1.60)                                | 0.6847 | 0.94 (0.61-1.44)                                  | 0.7082 |
| Adjusted for LDL, TG and SBP      | 0.97 (0.53-1.80)                                | 0.9346 | 0.88 (0.57-1.36)                                  | 0.5563 |
| Adjusted for LDL, TG, SBP and FSG | 1.63 (0.96-2.77)                                | 0.0727 | 0.88 (0.58-1.34)                                  | 0.5521 |
| Adjusted for LDL, TG, and FSG     | 1.41 (0.85-2.31)                                | 0.1784 | 0.91 (0.58-1.44)                                  | 0.6992 |

424 KoGES, Korean Genome Epidemiologic Study; KCPS-II, Korean Cancer Prevention Study-II; BBJ, Biobank of Japan; IVW, inverse variance weighted  
 425 method; OR, odds ratio; CI, confidence interval; MVMR, multivariable mendelian randomization; LDL, low density lipoprotein; HDL, high density lipoprotein;  
 426 TG, triglyceride; SBP, systolic blood pressure; FBS, fasting serum glucose

427 Table 3. Causal effect of indirect bilirubin on ischemic stroke

|                                   | KoGES (direct bilirubin), BBJ (ischemic stroke) |        | KCPS-II (direct bilirubin), BBJ (ischemic stroke) |        |
|-----------------------------------|-------------------------------------------------|--------|---------------------------------------------------|--------|
|                                   | IVW method, OR (95% CI)                         | P      | IVW method, OR (95% CI)                           | P      |
| Crude two sample MR               | 0.81 (0.68-0.97)                                | 0.0253 | 0.84 (0.70-1.01)                                  | 0.0598 |
| MVMR                              |                                                 |        |                                                   |        |
| Adjusted for LDL                  | 0.81 (0.65-1.02)                                | 0.0800 | 0.84 (0.72-0.98)                                  | 0.0288 |
| Adjusted for HDL                  | 0.88 (0.71-1.08)                                | 0.2262 | 0.85 (0.72-1.00)                                  | 0.0487 |
| Adjusted for TG*                  | 0.85 (0.69-1.06)                                | 0.1526 | 0.82 (0.70-0.96)                                  | 0.0149 |
| Adjusted for LDL and HDL          | 0.94 (0.62-1.44)                                | 0.7936 | 0.87 (0.68-1.11)                                  | 0.2604 |
| Adjusted for LDL and TG           | 0.98 (0.69-1.39)                                | 0.8989 | 0.74 (0.55-0.99)                                  | 0.0429 |
| Adjusted for HDL and TG           | 0.99 (0.63-1.57)                                | 0.9868 | 0.87 (0.65-1.16)                                  | 0.3455 |
| Adjusted for LDL, HDL and TG      | 0.79 (0.58-1.06)                                | 0.1192 | 0.74 (0.56-0.98)                                  | 0.0355 |
| Adjusted for LDL, HDL, TG and SBP | 0.95 (0.70-1.30)                                | 0.7647 | 0.78 (0.60-1.01)                                  | 0.0657 |
| Adjusted for LDL, TG and SBP      | 1.14 (0.73-1.78)                                | 0.5718 | 0.77 (0.59-0.99)                                  | 0.0505 |
| Adjusted for LDL, TG, SBP and FSG | 0.99 (0.99-1.00)                                | 0.4297 | 0.76 (0.59-0.98)                                  | 0.0386 |
| Adjusted for LDL, TG, and FSG     | 0.93 (0.60-1.42)                                | 0.7384 | 0.75 (0.57-0.98)                                  | 0.0348 |

428 KoGES, Korean Genome Epidemiologic Study; KCPS-II, Korean Cancer Prevention Study-II; BBJ, Biobank of Japan; IVW, inverse variance weighted  
 429 method; OR, odds ratio; CI, confidence interval; MVMR, multivariable mendelian randomization; LDL, low density lipoprotein; HDL, high density lipoprotein;  
 430 TG, triglyceride; SBP, systolic blood pressure; FBS, fasting serum glucose

Figure 1

A

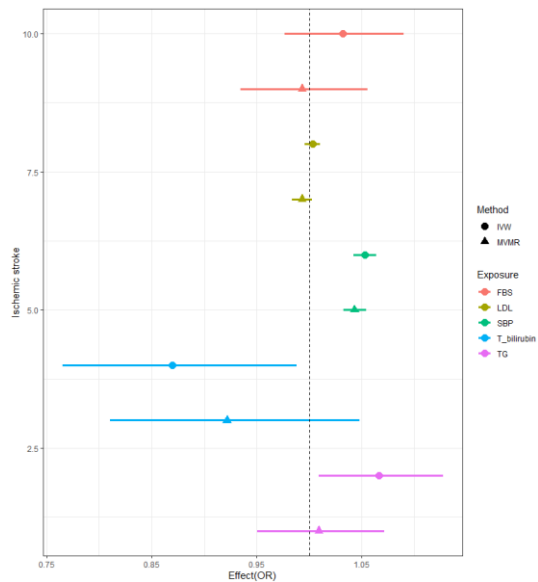

Total bilirubin and ischemic stroke

B

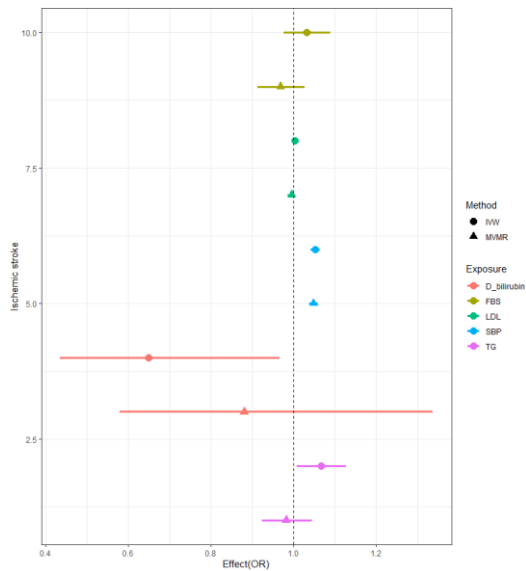

Direct bilirubin and ischemic stroke

C

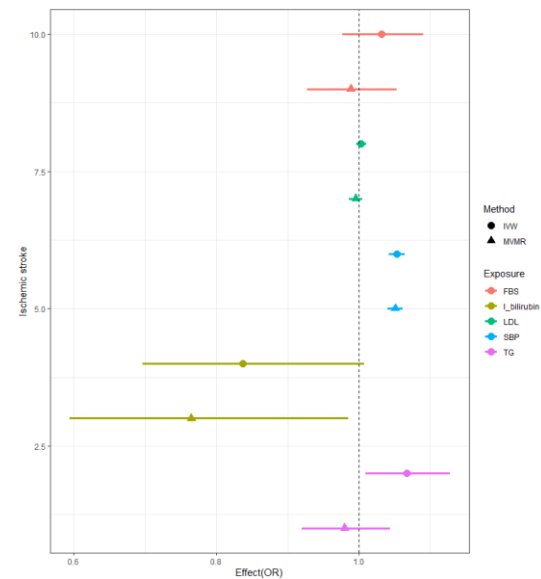

Indirect bilirubin and ischemic stroke
